# Supplementary material
Source: MDPI journal article supplement (https://www.mdpi.com/2073-4395/8/10/216)
Supplement: s1 [file s1]

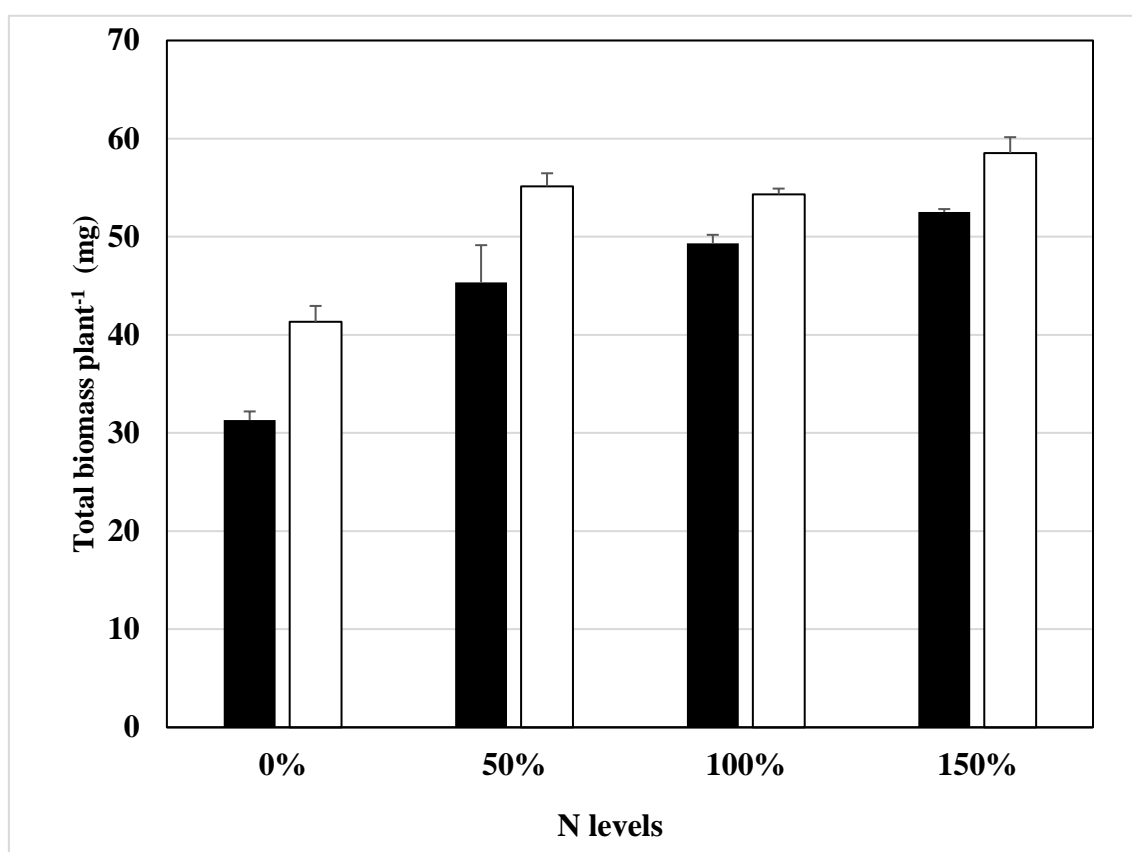

Supplementary Fig.1. Effect of TUAT-1 biofertilizer and nitrogen fertilizer on total biomass plant<sup>-1</sup> at nursery stage.
